# Supplementary material for: The NAMPT Inhibitor FK866 Increases Metformin Sensitivity in Pancreatic Cancer Cells
Source: Preprints.org preprint supplement (doi:10.20944/preprints202211.0068.v1), 2022-11-03
Supplement: Supplementary file 1 [file supplementary]

Appendix A

**Supplementary Figure 1: The combination of metformin and FK866 is not toxic in mice.** To determine if drug treatment was causing any toxicity, 3 mice per treatment group were randomly selected for necropsy once IP injections of drugs stopped after 5 weeks. Histograms show the changes in mouse weight compared to their weight on day of PANC1 subcutaneous injection and organ to weight ratios at time of necropsy. H&E staining of heart, liver, spleen, kidney, and pancreas tissues showed no histological changes between drug treatment groups in mice (n=3/group).

**
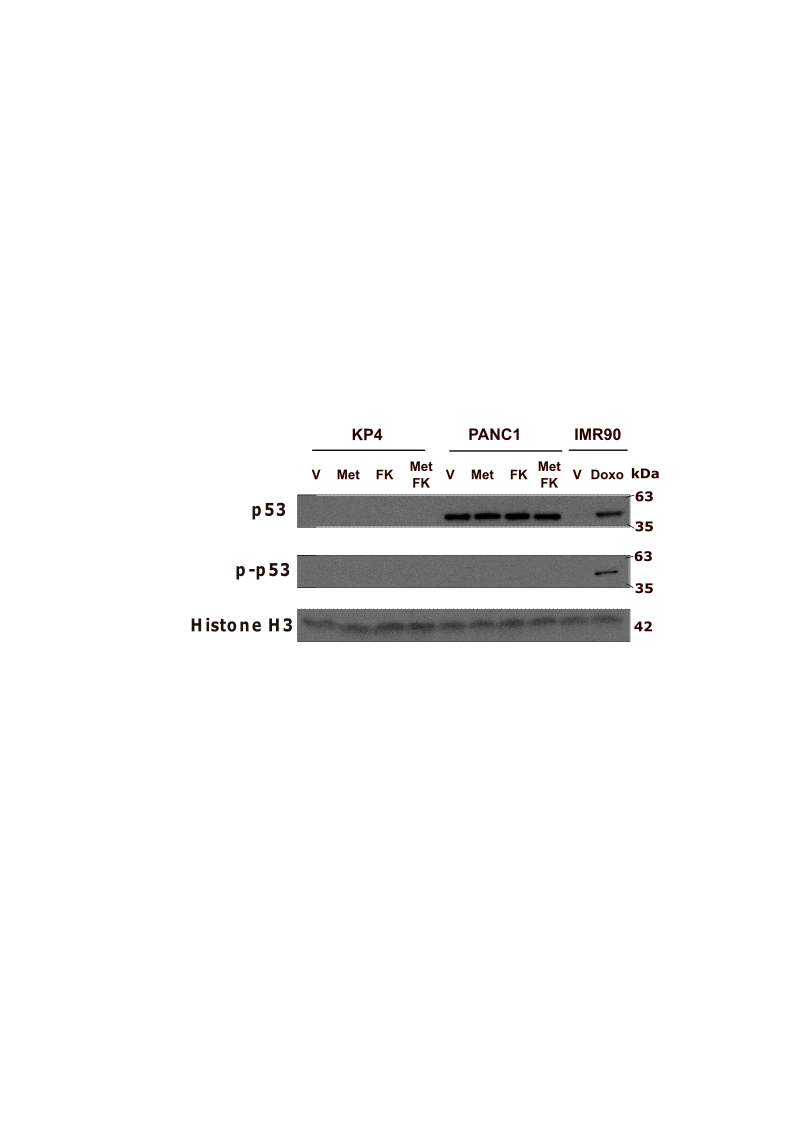
Supplementary Figure 2: P53 in Kp4 and Panc1 cells. (**A) Western blot for p53 and phospho-serine 15 p53 (p-p53) in KP4 and PANC1 cells treated for 24 h in the presence or absence of 10 mM metformin (Met), 5 nM of FK866 (FK), a combination of metformin and FK866 or with vehicle (V). As a positive control, normal human fibroblasts IMR90 cells were treated with Doxorubicin (Doxo) 300ng/mL for 18h.

| Primer | Sequence |
| --- | --- |
| qPCR primer *ATF3* Hs* forward | GGATTTTGCTAACCTGACGCC |
| qPCR primer *ATF3* Hs reverse | TTCCAGCTTCTCCGACTCTTTCT |
| qPCR primer *ERN1* Hs forward | CCTGAGGACGACGTGGACTA |
| qPCR primer *ERN1* Hs reverse | CATACAGAGTGGGCGTCAGC |
| qPCR primer *NDRG1* Hs forward | TCCTTCAACAGTTTGGGCTGA |
| qPCR primer *NDRG1* Hs reverse | CATCCTGAGATCTTGGAGGCG |
| qPCR primer *STC2* Hs forward | CCAGCACTGTTTGGTCAACG |
| qPCR primer *STC2* Hs reverse | TTGAGGTAGCATTCCCGCTG |
| †qPCR primer *HMBS* Hs forward | GGCAATGCGGCTGCAA |
| †qPCR primer *HMBS* Hs reverse | GGGTACCCACGCGAATCAC |
| †qPCR primer *TBP* Hs forward | GCTGGCCCATAGTGATCTTTGC |
| †qPCR primer *TBP* Hs reverse | CTTCACACGCCAAGAAACAGTGA |

Supplementary Table 1: RT-qPCR primers used in the study.

*Hs, Homo sapiens, † Housekeeping gene.
